# Supplementary material for: Genetic Divergence of Thai Indigenous Pigs from Three Distinct Geographic Regions Revealed by Microsatellite Marker Analysis
Source: MDPI journal article supplement (doi:10.3390/ani13040625), 2023-02-10
Supplement: s1 [file s1]

**Table S1.** Allele range (base pairs) of microsatellites loci in pig populations from different origins.

| Locus     | Country/Origin of data |          |          |         |         |         |
|-----------|------------------------|----------|----------|---------|---------|---------|
|           | Thailand               | Thailand | China    | India   | Korea   | ISAG    |
| S0155     | 137-169                | 132-166  | 116-158  |         | 145-168 | 150-166 |
| SW1828    | 83-114                 |          |          |         |         | 100-104 |
| S0226     | 201-237*               |          | 166-198  | 185-205 |         | 181-205 |
| SW240     | 86-130                 | 88-114   |          |         |         | 96-115  |
| S0002     | 182-246                |          |          |         |         | 190-216 |
| SW72      | 98-122                 |          | 90-118   | 100-112 | 95-134  | 100-116 |
| S0097     | 208-249*               |          | 135-155  |         |         | 135-155 |
| SW445     | 172-210                |          |          |         |         | 181-203 |
| IGF1      | 190-210                |          |          |         |         | 197-209 |
| S0005     | 203-257                | 201-246  | 134-168* | 221-257 | 200-257 | 205-248 |
| S0228     | 210-248                |          |          |         |         | 222-249 |
| SW122     | 98-132                 |          | 220-247* | 110-124 | 116-138 | 110-122 |
| SW2406    | 224-257*               |          | 117-131  |         |         | 117-131 |
| S0101     | 197-226                | 203-213  |          |         |         | 197-216 |
| SW632     | 150-174                |          | 148-173  |         | 151-190 | 159-180 |
| S0178     | 102-130                |          |          |         |         | 110-124 |
| SW2410    | 100-142                |          |          |         |         | 81-119  |
| SW911     | 149-175                |          | 217-255* | 157-175 |         | 153-177 |
| SW830     | 169-216                |          | 149-173  |         |         | 149-173 |
| SW951     | 120-141                | 120-132  | 123-133  |         | 123-145 | 125-133 |
| SW2008    | 89-110*                |          |          |         |         | 148-170 |
| S0090     | 239-254                | 226-249  | 227-253  | 243-251 | 200-260 | 244-251 |
| S0143     | 151-175*               |          |          |         |         | 261-289 |
| S0068     | 211-259                |          |          | 218-242 |         | 211-260 |
| SW857     | 133-165                | 134-162  | 144-168  |         | 142-168 | 144-160 |
| SW936     | 91-127                 |          | 91-120   |         | 80-120  | 80-117  |
| S0026     | 91-111                 |          |          |         | 90-113  | 92-106  |
| SW24      | 91-128                 | 93-118   |          | 92-112  | 91-129  | 96-121  |
| S0218     | 157-199                |          |          | 164-184 |         | 164-184 |
| Reference | This Study             | [22]     | [42]     | [16]    | [17]    | [25,26] |

\*Allele range differs from other reports.
